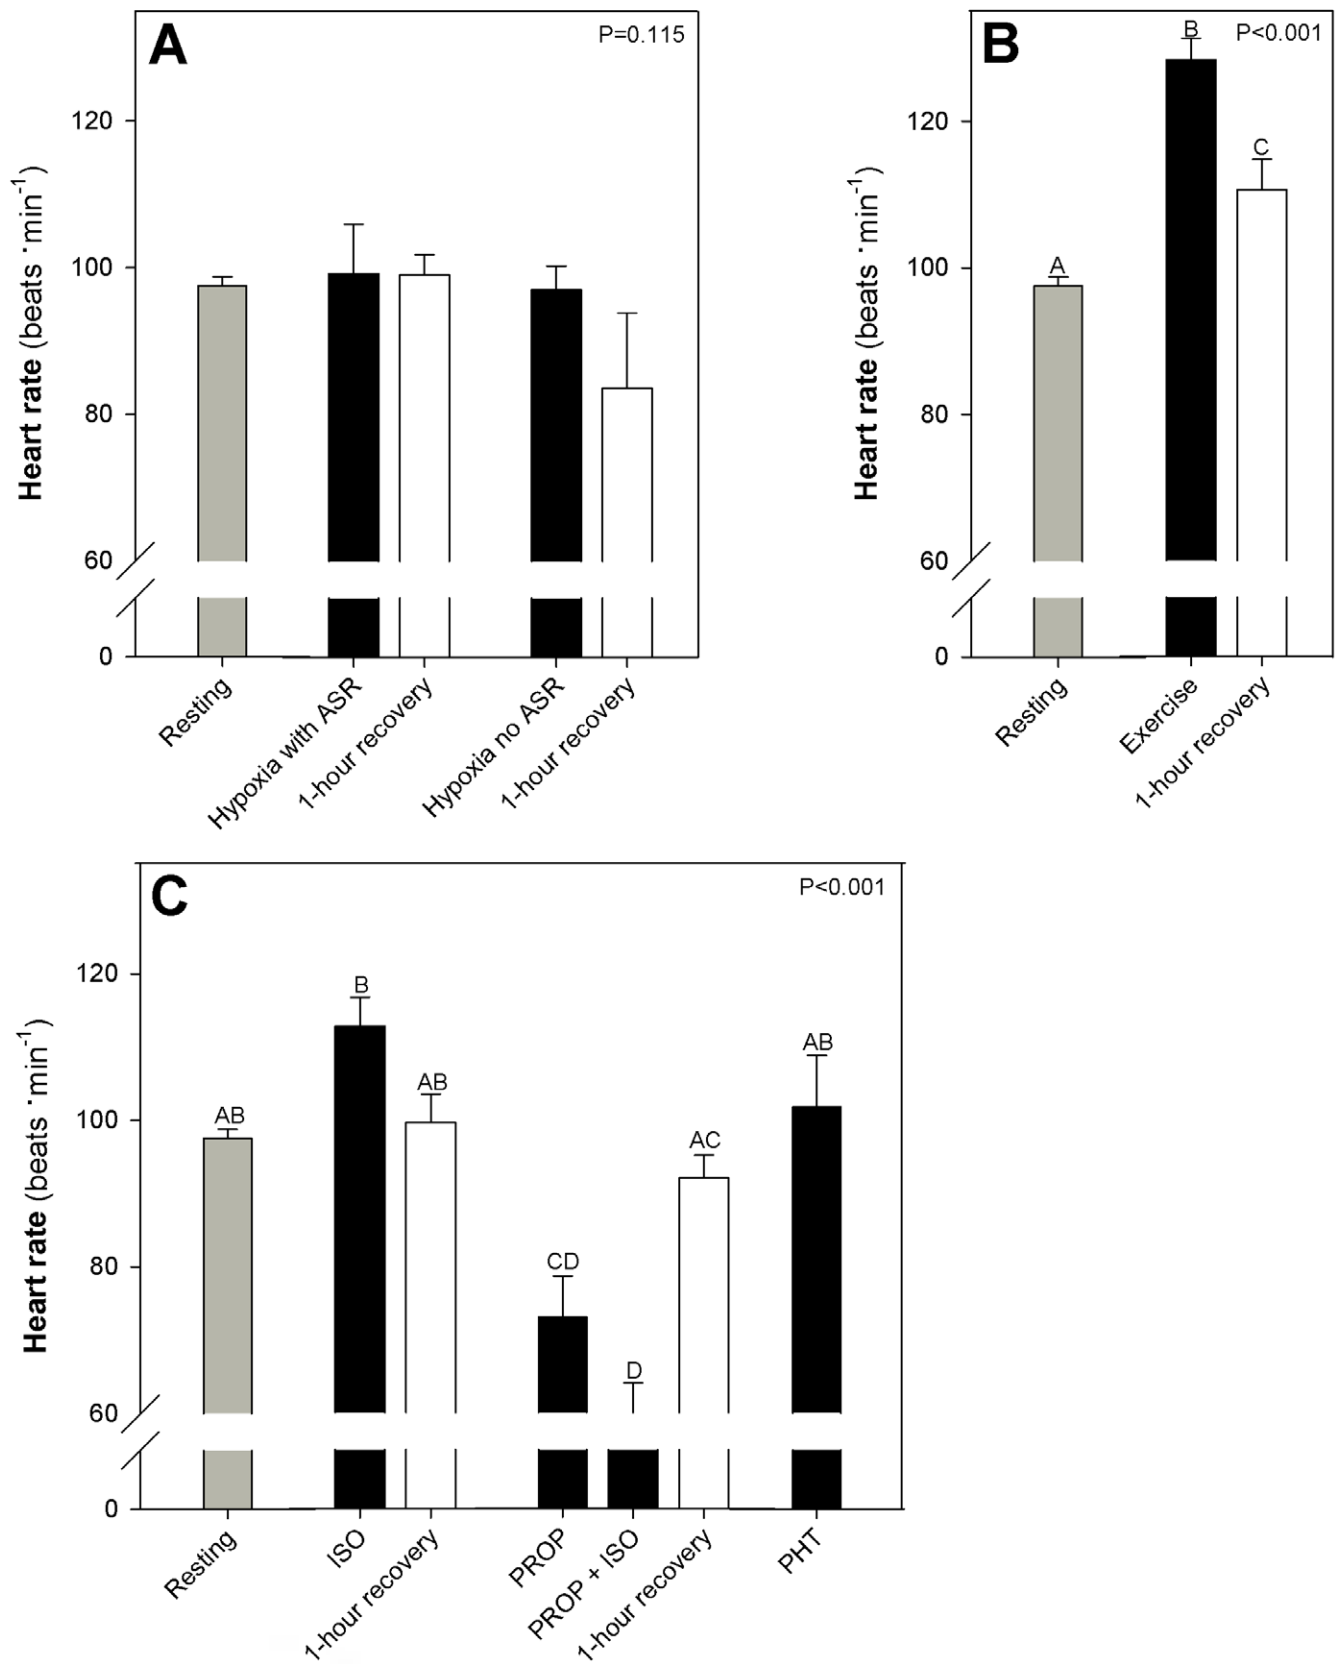

**Fig. S1.** Changes in heart rate ( $f_H$ ) in glass catfish upon and following exposure to hypoxia with surface access (ASR) and without surface access (no ASR) immediately and following 1 h recovery (A), immediately following and 1 h into recovery from exercise (B), and upon treatment with isoproterenol (ISO), propranolol (PROP), both sequentially (ISO+PROP), or phentolamine (PHT) immediately or following 1 h recovery (C). Data are plotted as means  $\pm$  s.e.m. A different group of fish was used for each type of treatment. Different letters denote significant differences within each panel, and *P*-values are given in the upper, right corner of each panel (ANOVA). See Materials and methods for further details.
